# Supplementary material for: Genomic and epigenomic evolution of acquired resistance to combination therapy in esophageal squamous cell carcinoma
Source: JCI journal article supplement (doi:10.1172/jci.insight.150203), 2021-09-07
Supplement: sd3 [file 3]

## ICMJE DISCLOSURE FORM

Date: June 12, 2021  
 Your Name: Qingjie Min  
 Manuscript Title: Genomic and epigenomic evolution of acquired resistance to chemotherapy combined with verapamil in esophageal squamous cell carcinoma  
 Manuscript number (if known): 150203-INS-CMED-1

In the interest of transparency, we ask you to disclose all relationships/activities/interests listed below that are related to the content of your manuscript. "Related" means any relation with for-profit or not-for-profit third parties whose interests may be affected by the content of the manuscript. Disclosure represents a commitment to transparency and does not necessarily indicate a bias. If you are in doubt about whether to list a relationship/activity/interest, it is preferable that you do so.

The following questions apply to the author's relationships/activities/interests as they relate to the **current manuscript only**.

The author's relationships/activities/interests should be **defined broadly**. For example, if your manuscript pertains to the epidemiology of hypertension, you should declare all relationships with manufacturers of antihypertensive medication, even if that medication is not mentioned in the manuscript.

In item #1 below, report all support for the work reported in this manuscript without time limit. For all other items, the time frame for disclosure is the past 36 months.

|                                                           |                                                                                                                                                                                    | Name all entities with whom you have this relationship or indicate none (add rows as needed)                                                                                                                                                                                                                                                                                          | Specifications/Comments (e.g., if payments were made to you or to your institution) |
|-----------------------------------------------------------|------------------------------------------------------------------------------------------------------------------------------------------------------------------------------------|---------------------------------------------------------------------------------------------------------------------------------------------------------------------------------------------------------------------------------------------------------------------------------------------------------------------------------------------------------------------------------------|-------------------------------------------------------------------------------------|
| <b>Time frame: Since the initial planning of the work</b> |                                                                                                                                                                                    |                                                                                                                                                                                                                                                                                                                                                                                       |                                                                                     |
| 1                                                         | All support for the present manuscript (e.g., funding, provision of study materials, medical writing, article processing charges, etc.)<br><br><b>No time limit for this item.</b> | National Natural Science Foundation of China<br>Science Foundation of Peking University Cancer Hospital<br>CAMS Innovation Fund for Medical Sciences<br>Major Program of Shenzhen Bay Laboratory<br>Guangdong Basic and Applied Basic Research Foundation<br>The third round of public welfare development and reform pilot projects of Beijing Municipal Medical Research Institutes |                                                                                     |

|                                   |                                                                                                              |                                                                |  |
|-----------------------------------|--------------------------------------------------------------------------------------------------------------|----------------------------------------------------------------|--|
|                                   |                                                                                                              | NATIONAL INSTITUTE OF HEALTH DATA SCIENCE OF PEKING UNIVERSITY |  |
| <b>Time frame: past 36 months</b> |                                                                                                              |                                                                |  |
| 2                                 | Grants or contracts from any entity (if not indicated in item #1 above).                                     | ___ None                                                       |  |
| 3                                 | Royalties or licenses                                                                                        | ___ None                                                       |  |
| 4                                 | Consulting fees                                                                                              | ___ None                                                       |  |
| 5                                 | Payment or honoraria for lectures, presentations, speakers bureaus, manuscript writing or educational events | ___ None                                                       |  |
| 6                                 | Payment for expert testimony                                                                                 | ___ None                                                       |  |
| 7                                 | Support for attending meetings and/or travel                                                                 | ___ None                                                       |  |
| 8                                 | Patents planned, issued or pending                                                                           | ___ None                                                       |  |
| 9                                 | Participation on a Data Safety Monitoring Board or Advisory Board                                            | ___ None                                                       |  |
| 10                                | Leadership or fiduciary role in other board, society, committee or advocacy group, paid or unpaid            | ___ None                                                       |  |
| 11                                | Stock or stock options                                                                                       | ___ None                                                       |  |
| 12                                | Receipt of equipment, materials, drugs, medical writing, gifts or other services                             | ___ None                                                       |  |

|    |                                            |                               |  |
|----|--------------------------------------------|-------------------------------|--|
| 13 | Other financial or non-financial interests | <input type="checkbox"/> None |  |
|    |                                            |                               |  |
|    |                                            |                               |  |

Please place an "X" next to the following statement to indicate your agreement:

I certify that I have answered every question and have not altered the wording of any of the questions on this form.

## ICMJE DISCLOSURE FORM

Date: June 12, 2021  
 Your Name: Yan Wang  
 Manuscript Title: Genomic and epigenomic evolution of acquired resistance to chemotherapy combined with verapamil in esophageal squamous cell carcinoma  
 Manuscript number (if known): 150203-INS-CMED-1

In the interest of transparency, we ask you to disclose all relationships/activities/interests listed below that are related to the content of your manuscript. “Related” means any relation with for-profit or not-for-profit third parties whose interests may be affected by the content of the manuscript. Disclosure represents a commitment to transparency and does not necessarily indicate a bias. If you are in doubt about whether to list a relationship/activity/interest, it is preferable that you do so.

The following questions apply to the author’s relationships/activities/interests as they relate to the **current manuscript only**.

The author’s relationships/activities/interests should be **defined broadly**. For example, if your manuscript pertains to the epidemiology of hypertension, you should declare all relationships with manufacturers of antihypertensive medication, even if that medication is not mentioned in the manuscript.

In item #1 below, report all support for the work reported in this manuscript without time limit. For all other items, the time frame for disclosure is the past 36 months.

|                                                           |                                                                                                                                                                                    | Name all entities with whom you have this relationship or indicate none (add rows as needed)                                                                                                                                                                                                                                                                                          | Specifications/Comments (e.g., if payments were made to you or to your institution) |
|-----------------------------------------------------------|------------------------------------------------------------------------------------------------------------------------------------------------------------------------------------|---------------------------------------------------------------------------------------------------------------------------------------------------------------------------------------------------------------------------------------------------------------------------------------------------------------------------------------------------------------------------------------|-------------------------------------------------------------------------------------|
| <b>Time frame: Since the initial planning of the work</b> |                                                                                                                                                                                    |                                                                                                                                                                                                                                                                                                                                                                                       |                                                                                     |
| 1                                                         | All support for the present manuscript (e.g., funding, provision of study materials, medical writing, article processing charges, etc.)<br><br><b>No time limit for this item.</b> | National Natural Science Foundation of China<br>Science Foundation of Peking University Cancer Hospital<br>CAMS Innovation Fund for Medical Sciences<br>Major Program of Shenzhen Bay Laboratory<br>Guangdong Basic and Applied Basic Research Foundation<br>The third round of public welfare development and reform pilot projects of Beijing Municipal Medical Research Institutes |                                                                                     |

|                                   |                                                                                                              |                                                                |  |
|-----------------------------------|--------------------------------------------------------------------------------------------------------------|----------------------------------------------------------------|--|
|                                   |                                                                                                              | NATIONAL INSTITUTE OF HEALTH DATA SCIENCE OF PEKING UNIVERSITY |  |
| <b>Time frame: past 36 months</b> |                                                                                                              |                                                                |  |
| 2                                 | Grants or contracts from any entity (if not indicated in item #1 above).                                     | ___ None                                                       |  |
| 3                                 | Royalties or licenses                                                                                        | ___ None                                                       |  |
| 4                                 | Consulting fees                                                                                              | ___ None                                                       |  |
| 5                                 | Payment or honoraria for lectures, presentations, speakers bureaus, manuscript writing or educational events | ___ None                                                       |  |
| 6                                 | Payment for expert testimony                                                                                 | ___ None                                                       |  |
| 7                                 | Support for attending meetings and/or travel                                                                 | ___ None                                                       |  |
| 8                                 | Patents planned, issued or pending                                                                           | ___ None                                                       |  |
| 9                                 | Participation on a Data Safety Monitoring Board or Advisory Board                                            | ___ None                                                       |  |
| 10                                | Leadership or fiduciary role in other board, society, committee or advocacy group, paid or unpaid            | ___ None                                                       |  |
| 11                                | Stock or stock options                                                                                       | ___ None                                                       |  |
| 12                                | Receipt of equipment, materials, drugs, medical writing, gifts or other services                             | ___ None                                                       |  |

|    |                                            |                               |  |
|----|--------------------------------------------|-------------------------------|--|
| 13 | Other financial or non-financial interests | <input type="checkbox"/> None |  |
|    |                                            |                               |  |
|    |                                            |                               |  |

Please place an "X" next to the following statement to indicate your agreement:

I certify that I have answered every question and have not altered the wording of any of the questions on this form.

## ICMJE DISCLOSURE FORM

Date: June 12, 2021  
 Your Name: Qingnan Wu  
 Manuscript Title: Genomic and epigenomic evolution of acquired resistance to chemotherapy combined with verapamil in esophageal squamous cell carcinoma  
 Manuscript number (if known): 150203-INS-CMED-1

In the interest of transparency, we ask you to disclose all relationships/activities/interests listed below that are related to the content of your manuscript. "Related" means any relation with for-profit or not-for-profit third parties whose interests may be affected by the content of the manuscript. Disclosure represents a commitment to transparency and does not necessarily indicate a bias. If you are in doubt about whether to list a relationship/activity/interest, it is preferable that you do so.

The following questions apply to the author's relationships/activities/interests as they relate to the **current manuscript only**.

The author's relationships/activities/interests should be **defined broadly**. For example, if your manuscript pertains to the epidemiology of hypertension, you should declare all relationships with manufacturers of antihypertensive medication, even if that medication is not mentioned in the manuscript.

In item #1 below, report all support for the work reported in this manuscript without time limit. For all other items, the time frame for disclosure is the past 36 months.

|                                                           |                                                                                                                                                                                    | Name all entities with whom you have this relationship or indicate none (add rows as needed)                                                                                                                                                                                                                                                                                          | Specifications/Comments (e.g., if payments were made to you or to your institution) |
|-----------------------------------------------------------|------------------------------------------------------------------------------------------------------------------------------------------------------------------------------------|---------------------------------------------------------------------------------------------------------------------------------------------------------------------------------------------------------------------------------------------------------------------------------------------------------------------------------------------------------------------------------------|-------------------------------------------------------------------------------------|
| <b>Time frame: Since the initial planning of the work</b> |                                                                                                                                                                                    |                                                                                                                                                                                                                                                                                                                                                                                       |                                                                                     |
| 1                                                         | All support for the present manuscript (e.g., funding, provision of study materials, medical writing, article processing charges, etc.)<br><br><b>No time limit for this item.</b> | National Natural Science Foundation of China<br>Science Foundation of Peking University Cancer Hospital<br>CAMS Innovation Fund for Medical Sciences<br>Major Program of Shenzhen Bay Laboratory<br>Guangdong Basic and Applied Basic Research Foundation<br>The third round of public welfare development and reform pilot projects of Beijing Municipal Medical Research Institutes |                                                                                     |

|                                   |                                                                                                              |                                                                |  |
|-----------------------------------|--------------------------------------------------------------------------------------------------------------|----------------------------------------------------------------|--|
|                                   |                                                                                                              | NATIONAL INSTITUTE OF HEALTH DATA SCIENCE OF PEKING UNIVERSITY |  |
| <b>Time frame: past 36 months</b> |                                                                                                              |                                                                |  |
| 2                                 | Grants or contracts from any entity (if not indicated in item #1 above).                                     | ___ None                                                       |  |
| 3                                 | Royalties or licenses                                                                                        | ___ None                                                       |  |
| 4                                 | Consulting fees                                                                                              | ___ None                                                       |  |
| 5                                 | Payment or honoraria for lectures, presentations, speakers bureaus, manuscript writing or educational events | ___ None                                                       |  |
| 6                                 | Payment for expert testimony                                                                                 | ___ None                                                       |  |
| 7                                 | Support for attending meetings and/or travel                                                                 | ___ None                                                       |  |
| 8                                 | Patents planned, issued or pending                                                                           | ___ None                                                       |  |
| 9                                 | Participation on a Data Safety Monitoring Board or Advisory Board                                            | ___ None                                                       |  |
| 10                                | Leadership or fiduciary role in other board, society, committee or advocacy group, paid or unpaid            | ___ None                                                       |  |
| 11                                | Stock or stock options                                                                                       | ___ None                                                       |  |
| 12                                | Receipt of equipment, materials, drugs, medical writing, gifts or other services                             | ___ None                                                       |  |



|    |                                            |                               |  |
|----|--------------------------------------------|-------------------------------|--|
| 13 | Other financial or non-financial interests | <input type="checkbox"/> None |  |
|    |                                            |                               |  |
|    |                                            |                               |  |

Please place an "X" next to the following statement to indicate your agreement:

I certify that I have answered every question and have not altered the wording of any of the questions on this form.

## ICMJE DISCLOSURE FORM

Date: June 12, 2021  
 Your Name: Xianfeng Li  
 Manuscript Title: Genomic and epigenomic evolution of acquired resistance to chemotherapy combined with verapamil in esophageal squamous cell carcinoma  
 Manuscript number (if known): 150203-INS-CMED-1

In the interest of transparency, we ask you to disclose all relationships/activities/interests listed below that are related to the content of your manuscript. "Related" means any relation with for-profit or not-for-profit third parties whose interests may be affected by the content of the manuscript. Disclosure represents a commitment to transparency and does not necessarily indicate a bias. If you are in doubt about whether to list a relationship/activity/interest, it is preferable that you do so.

The following questions apply to the author's relationships/activities/interests as they relate to the **current manuscript only**.

The author's relationships/activities/interests should be **defined broadly**. For example, if your manuscript pertains to the epidemiology of hypertension, you should declare all relationships with manufacturers of antihypertensive medication, even if that medication is not mentioned in the manuscript.

In item #1 below, report all support for the work reported in this manuscript without time limit. For all other items, the time frame for disclosure is the past 36 months.

|                                                           |                                                                                                                                                                                    | Name all entities with whom you have this relationship or indicate none (add rows as needed)                                                                                                                                                                                                                                                                                          | Specifications/Comments (e.g., if payments were made to you or to your institution) |
|-----------------------------------------------------------|------------------------------------------------------------------------------------------------------------------------------------------------------------------------------------|---------------------------------------------------------------------------------------------------------------------------------------------------------------------------------------------------------------------------------------------------------------------------------------------------------------------------------------------------------------------------------------|-------------------------------------------------------------------------------------|
| <b>Time frame: Since the initial planning of the work</b> |                                                                                                                                                                                    |                                                                                                                                                                                                                                                                                                                                                                                       |                                                                                     |
| 1                                                         | All support for the present manuscript (e.g., funding, provision of study materials, medical writing, article processing charges, etc.)<br><br><b>No time limit for this item.</b> | National Natural Science Foundation of China<br>Science Foundation of Peking University Cancer Hospital<br>CAMS Innovation Fund for Medical Sciences<br>Major Program of Shenzhen Bay Laboratory<br>Guangdong Basic and Applied Basic Research Foundation<br>The third round of public welfare development and reform pilot projects of Beijing Municipal Medical Research Institutes |                                                                                     |

|                                   |                                                                                                              |                                                                |  |
|-----------------------------------|--------------------------------------------------------------------------------------------------------------|----------------------------------------------------------------|--|
|                                   |                                                                                                              | NATIONAL INSTITUTE OF HEALTH DATA SCIENCE OF PEKING UNIVERSITY |  |
| <b>Time frame: past 36 months</b> |                                                                                                              |                                                                |  |
| 2                                 | Grants or contracts from any entity (if not indicated in item #1 above).                                     | ___ None                                                       |  |
| 3                                 | Royalties or licenses                                                                                        | ___ None                                                       |  |
| 4                                 | Consulting fees                                                                                              | ___ None                                                       |  |
| 5                                 | Payment or honoraria for lectures, presentations, speakers bureaus, manuscript writing or educational events | ___ None                                                       |  |
| 6                                 | Payment for expert testimony                                                                                 | ___ None                                                       |  |
| 7                                 | Support for attending meetings and/or travel                                                                 | ___ None                                                       |  |
| 8                                 | Patents planned, issued or pending                                                                           | ___ None                                                       |  |
| 9                                 | Participation on a Data Safety Monitoring Board or Advisory Board                                            | ___ None                                                       |  |
| 10                                | Leadership or fiduciary role in other board, society, committee or advocacy group, paid or unpaid            | ___ None                                                       |  |
| 11                                | Stock or stock options                                                                                       | ___ None                                                       |  |
| 12                                | Receipt of equipment, materials, drugs, medical writing, gifts or other services                             | ___ None                                                       |  |

|    |                                            |                               |  |
|----|--------------------------------------------|-------------------------------|--|
| 13 | Other financial or non-financial interests | <input type="checkbox"/> None |  |
|    |                                            |                               |  |
|    |                                            |                               |  |

Please place an "X" next to the following statement to indicate your agreement:

I certify that I have answered every question and have not altered the wording of any of the questions on this form.

## ICMJE DISCLOSURE FORM

Date: June 12, 2021  
 Your Name: Huajing Teng  
 Manuscript Title: Genomic and epigenomic evolution of acquired resistance to chemotherapy combined with verapamil in esophageal squamous cell carcinoma  
 Manuscript number (if known): 150203-INS-CMED-1

In the interest of transparency, we ask you to disclose all relationships/activities/interests listed below that are related to the content of your manuscript. "Related" means any relation with for-profit or not-for-profit third parties whose interests may be affected by the content of the manuscript. Disclosure represents a commitment to transparency and does not necessarily indicate a bias. If you are in doubt about whether to list a relationship/activity/interest, it is preferable that you do so.

The following questions apply to the author's relationships/activities/interests as they relate to the current manuscript only.

The author's relationships/activities/interests should be defined broadly. For example, if your manuscript pertains to the epidemiology of hypertension, you should declare all relationships with manufacturers of antihypertensive medication, even if that medication is not mentioned in the manuscript.

In item #1 below, report all support for the work reported in this manuscript without time limit. For all other items, the time frame for disclosure is the past 36 months.

|                                                           |                                                                                                                                                                                    | Name all entities with whom you have this relationship or indicate none (add rows as needed)                                                                                                                                                                                                                                                                                          | Specifications/Comments (e.g., if payments were made to you or to your institution) |
|-----------------------------------------------------------|------------------------------------------------------------------------------------------------------------------------------------------------------------------------------------|---------------------------------------------------------------------------------------------------------------------------------------------------------------------------------------------------------------------------------------------------------------------------------------------------------------------------------------------------------------------------------------|-------------------------------------------------------------------------------------|
| <b>Time frame: Since the initial planning of the work</b> |                                                                                                                                                                                    |                                                                                                                                                                                                                                                                                                                                                                                       |                                                                                     |
| 1                                                         | All support for the present manuscript (e.g., funding, provision of study materials, medical writing, article processing charges, etc.)<br><br><b>No time limit for this item.</b> | National Natural Science Foundation of China<br>Science Foundation of Peking University Cancer Hospital<br>CAMS Innovation Fund for Medical Sciences<br>Major Program of Shenzhen Bay Laboratory<br>Guangdong Basic and Applied Basic Research Foundation<br>The third round of public welfare development and reform pilot projects of Beijing Municipal Medical Research Institutes |                                                                                     |

|                                   |                                                                                                              |                                                                |  |
|-----------------------------------|--------------------------------------------------------------------------------------------------------------|----------------------------------------------------------------|--|
|                                   |                                                                                                              | NATIONAL INSTITUTE OF HEALTH DATA SCIENCE OF PEKING UNIVERSITY |  |
| <b>Time frame: past 36 months</b> |                                                                                                              |                                                                |  |
| 2                                 | Grants or contracts from any entity (if not indicated in item #1 above).                                     | ___ None                                                       |  |
| 3                                 | Royalties or licenses                                                                                        | ___ None                                                       |  |
| 4                                 | Consulting fees                                                                                              | ___ None                                                       |  |
| 5                                 | Payment or honoraria for lectures, presentations, speakers bureaus, manuscript writing or educational events | ___ None                                                       |  |
| 6                                 | Payment for expert testimony                                                                                 | ___ None                                                       |  |
| 7                                 | Support for attending meetings and/or travel                                                                 | ___ None                                                       |  |
| 8                                 | Patents planned, issued or pending                                                                           | ___ None                                                       |  |
| 9                                 | Participation on a Data Safety Monitoring Board or Advisory Board                                            | ___ None                                                       |  |
| 10                                | Leadership or fiduciary role in other board, society, committee or advocacy group, paid or unpaid            | ___ None                                                       |  |
| 11                                | Stock or stock options                                                                                       | ___ None                                                       |  |
| 12                                | Receipt of equipment, materials, drugs, medical writing, gifts or other services                             | ___ None                                                       |  |

|    |                                            |                               |  |
|----|--------------------------------------------|-------------------------------|--|
| 13 | Other financial or non-financial interests | <input type="checkbox"/> None |  |
|    |                                            |                               |  |
|    |                                            |                               |  |

Please place an "X" next to the following statement to indicate your agreement:

I certify that I have answered every question and have not altered the wording of any of the questions on this form.

## ICMJE DISCLOSURE FORM

Date: June 12, 2021  
 Your Name: Jiawen Fan  
 Manuscript Title: Genomic and epigenomic evolution of acquired resistance to chemotherapy combined with verapamil in esophageal squamous cell carcinoma  
 Manuscript number (if known): 150203-INS-CMED-1

In the interest of transparency, we ask you to disclose all relationships/activities/interests listed below that are related to the content of your manuscript. "Related" means any relation with for-profit or not-for-profit third parties whose interests may be affected by the content of the manuscript. Disclosure represents a commitment to transparency and does not necessarily indicate a bias. If you are in doubt about whether to list a relationship/activity/interest, it is preferable that you do so.

The following questions apply to the author's relationships/activities/interests as they relate to the current manuscript only.

The author's relationships/activities/interests should be defined broadly. For example, if your manuscript pertains to the epidemiology of hypertension, you should declare all relationships with manufacturers of antihypertensive medication, even if that medication is not mentioned in the manuscript.

In item #1 below, report all support for the work reported in this manuscript without time limit. For all other items, the time frame for disclosure is the past 36 months.

|                                                           |                                                                                                                                                                                    | Name all entities with whom you have this relationship or indicate none (add rows as needed)                                                                                                                                                                                                                                                                                          | Specifications/Comments (e.g., if payments were made to you or to your institution) |
|-----------------------------------------------------------|------------------------------------------------------------------------------------------------------------------------------------------------------------------------------------|---------------------------------------------------------------------------------------------------------------------------------------------------------------------------------------------------------------------------------------------------------------------------------------------------------------------------------------------------------------------------------------|-------------------------------------------------------------------------------------|
| <b>Time frame: Since the initial planning of the work</b> |                                                                                                                                                                                    |                                                                                                                                                                                                                                                                                                                                                                                       |                                                                                     |
| 1                                                         | All support for the present manuscript (e.g., funding, provision of study materials, medical writing, article processing charges, etc.)<br><br><b>No time limit for this item.</b> | National Natural Science Foundation of China<br>Science Foundation of Peking University Cancer Hospital<br>CAMS Innovation Fund for Medical Sciences<br>Major Program of Shenzhen Bay Laboratory<br>Guangdong Basic and Applied Basic Research Foundation<br>The third round of public welfare development and reform pilot projects of Beijing Municipal Medical Research Institutes |                                                                                     |



|                                   |                                                                                                              |                                                                |  |
|-----------------------------------|--------------------------------------------------------------------------------------------------------------|----------------------------------------------------------------|--|
|                                   |                                                                                                              | NATIONAL INSTITUTE OF HEALTH DATA SCIENCE OF PEKING UNIVERSITY |  |
| <b>Time frame: past 36 months</b> |                                                                                                              |                                                                |  |
| 2                                 | Grants or contracts from any entity (if not indicated in item #1 above).                                     | ___ None                                                       |  |
| 3                                 | Royalties or licenses                                                                                        | ___ None                                                       |  |
| 4                                 | Consulting fees                                                                                              | ___ None                                                       |  |
| 5                                 | Payment or honoraria for lectures, presentations, speakers bureaus, manuscript writing or educational events | ___ None                                                       |  |
| 6                                 | Payment for expert testimony                                                                                 | ___ None                                                       |  |
| 7                                 | Support for attending meetings and/or travel                                                                 | ___ None                                                       |  |
| 8                                 | Patents planned, issued or pending                                                                           | ___ None                                                       |  |
| 9                                 | Participation on a Data Safety Monitoring Board or Advisory Board                                            | ___ None                                                       |  |
| 10                                | Leadership or fiduciary role in other board, society, committee or advocacy group, paid or unpaid            | ___ None                                                       |  |
| 11                                | Stock or stock options                                                                                       | ___ None                                                       |  |
| 12                                | Receipt of equipment, materials, drugs, medical writing, gifts or other services                             | ___ None                                                       |  |

|    |                                            |                               |  |
|----|--------------------------------------------|-------------------------------|--|
| 13 | Other financial or non-financial interests | <input type="checkbox"/> None |  |
|    |                                            |                               |  |
|    |                                            |                               |  |

Please place an "X" next to the following statement to indicate your agreement:

I certify that I have answered every question and have not altered the wording of any of the questions on this form.

## ICMJE DISCLOSURE FORM

Date: June 12, 2021  
 Your Name: Yiren Cao  
 Manuscript Title: Genomic and epigenomic evolution of acquired resistance to chemotherapy combined with verapamil in esophageal squamous cell carcinoma  
 Manuscript number (if known): 150203-INS-CMED-1

In the interest of transparency, we ask you to disclose all relationships/activities/interests listed below that are related to the content of your manuscript. "Related" means any relation with for-profit or not-for-profit third parties whose interests may be affected by the content of the manuscript. Disclosure represents a commitment to transparency and does not necessarily indicate a bias. If you are in doubt about whether to list a relationship/activity/interest, it is preferable that you do so.

The following questions apply to the author's relationships/activities/interests as they relate to the current manuscript only.

The author's relationships/activities/interests should be defined broadly. For example, if your manuscript pertains to the epidemiology of hypertension, you should declare all relationships with manufacturers of antihypertensive medication, even if that medication is not mentioned in the manuscript.

In item #1 below, report all support for the work reported in this manuscript without time limit. For all other items, the time frame for disclosure is the past 36 months.

|                                                           |                                                                                                                                                                                    | Name all entities with whom you have this relationship or indicate none (add rows as needed)                                                                                                                                                                                                                                                                                          | Specifications/Comments (e.g., if payments were made to you or to your institution) |
|-----------------------------------------------------------|------------------------------------------------------------------------------------------------------------------------------------------------------------------------------------|---------------------------------------------------------------------------------------------------------------------------------------------------------------------------------------------------------------------------------------------------------------------------------------------------------------------------------------------------------------------------------------|-------------------------------------------------------------------------------------|
| <b>Time frame: Since the initial planning of the work</b> |                                                                                                                                                                                    |                                                                                                                                                                                                                                                                                                                                                                                       |                                                                                     |
| 1                                                         | All support for the present manuscript (e.g., funding, provision of study materials, medical writing, article processing charges, etc.)<br><br><b>No time limit for this item.</b> | National Natural Science Foundation of China<br>Science Foundation of Peking University Cancer Hospital<br>CAMS Innovation Fund for Medical Sciences<br>Major Program of Shenzhen Bay Laboratory<br>Guangdong Basic and Applied Basic Research Foundation<br>The third round of public welfare development and reform pilot projects of Beijing Municipal Medical Research Institutes |                                                                                     |

|                                   |                                                                                                              |                                                                |  |
|-----------------------------------|--------------------------------------------------------------------------------------------------------------|----------------------------------------------------------------|--|
|                                   |                                                                                                              | NATIONAL INSTITUTE OF HEALTH DATA SCIENCE OF PEKING UNIVERSITY |  |
| <b>Time frame: past 36 months</b> |                                                                                                              |                                                                |  |
| 2                                 | Grants or contracts from any entity (if not indicated in item #1 above).                                     | ___ None                                                       |  |
| 3                                 | Royalties or licenses                                                                                        | ___ None                                                       |  |
| 4                                 | Consulting fees                                                                                              | ___ None                                                       |  |
| 5                                 | Payment or honoraria for lectures, presentations, speakers bureaus, manuscript writing or educational events | ___ None                                                       |  |
| 6                                 | Payment for expert testimony                                                                                 | ___ None                                                       |  |
| 7                                 | Support for attending meetings and/or travel                                                                 | ___ None                                                       |  |
| 8                                 | Patents planned, issued or pending                                                                           | ___ None                                                       |  |
| 9                                 | Participation on a Data Safety Monitoring Board or Advisory Board                                            | ___ None                                                       |  |
| 10                                | Leadership or fiduciary role in other board, society, committee or advocacy group, paid or unpaid            | ___ None                                                       |  |
| 11                                | Stock or stock options                                                                                       | ___ None                                                       |  |
| 12                                | Receipt of equipment, materials, drugs, medical writing, gifts or other services                             | ___ None                                                       |  |

|    |                                            |                               |  |
|----|--------------------------------------------|-------------------------------|--|
| 13 | Other financial or non-financial interests | <input type="checkbox"/> None |  |
|    |                                            |                               |  |
|    |                                            |                               |  |

Please place an "X" next to the following statement to indicate your agreement:

I certify that I have answered every question and have not altered the wording of any of the questions on this form.

## ICMJE DISCLOSURE FORM

Date: June 12, 2021

Your Name: Pingsheng Fan

Manuscript Title: Genomic and epigenomic evolution of acquired resistance to chemotherapy combined with verapamil in esophageal squamous cell carcinoma

Manuscript number (if known): 150203-INS-CMED-1

In the interest of transparency, we ask you to disclose all relationships/activities/interests listed below that are related to the content of your manuscript. "Related" means any relation with for-profit or not-for-profit third parties whose interests may be affected by the content of the manuscript. Disclosure represents a commitment to transparency and does not necessarily indicate a bias. If you are in doubt about whether to list a relationship/activity/interest, it is preferable that you do so.

The following questions apply to the author's relationships/activities/interests as they relate to the current manuscript only.

The author's relationships/activities/interests should be defined broadly. For example, if your manuscript pertains to the epidemiology of hypertension, you should declare all relationships with manufacturers of antihypertensive medication, even if that medication is not mentioned in the manuscript.

In item #1 below, report all support for the work reported in this manuscript without time limit. For all other items, the time frame for disclosure is the past 36 months.

|                                                           |                                                                                                                                                                                | Name all entities with whom you have this relationship or indicate none (add rows as needed)                                                                                                                                                                                                                                                                                          | Specifications/Comments (e.g., if payments were made to you or to your institution) |
|-----------------------------------------------------------|--------------------------------------------------------------------------------------------------------------------------------------------------------------------------------|---------------------------------------------------------------------------------------------------------------------------------------------------------------------------------------------------------------------------------------------------------------------------------------------------------------------------------------------------------------------------------------|-------------------------------------------------------------------------------------|
| <b>Time frame: Since the initial planning of the work</b> |                                                                                                                                                                                |                                                                                                                                                                                                                                                                                                                                                                                       |                                                                                     |
| 1                                                         | All support for the present manuscript (e.g., funding, provision of study materials, medical writing, article processing charges, etc.)<br><b>No time limit for this item.</b> | National Natural Science Foundation of China<br>Science Foundation of Peking University Cancer Hospital<br>CAMS Innovation Fund for Medical Sciences<br>Major Program of Shenzhen Bay Laboratory<br>Guangdong Basic and Applied Basic Research Foundation<br>The third round of public welfare development and reform pilot projects of Beijing Municipal Medical Research Institutes |                                                                                     |

|                                   |                                                                                                              |                                                                |  |
|-----------------------------------|--------------------------------------------------------------------------------------------------------------|----------------------------------------------------------------|--|
|                                   |                                                                                                              | NATIONAL INSTITUTE OF HEALTH DATA SCIENCE OF PEKING UNIVERSITY |  |
| <b>Time frame: past 36 months</b> |                                                                                                              |                                                                |  |
| 2                                 | Grants or contracts from any entity (if not indicated in item #1 above).                                     | ___ None                                                       |  |
| 3                                 | Royalties or licenses                                                                                        | ___ None                                                       |  |
| 4                                 | Consulting fees                                                                                              | ___ None                                                       |  |
| 5                                 | Payment or honoraria for lectures, presentations, speakers bureaus, manuscript writing or educational events | ___ None                                                       |  |
| 6                                 | Payment for expert testimony                                                                                 | ___ None                                                       |  |
| 7                                 | Support for attending meetings and/or travel                                                                 | ___ None                                                       |  |
| 8                                 | Patents planned, issued or pending                                                                           | ___ None                                                       |  |
| 9                                 | Participation on a Data Safety Monitoring Board or Advisory Board                                            | ___ None                                                       |  |
| 10                                | Leadership or fiduciary role in other board, society, committee or advocacy group, paid or unpaid            | ___ None                                                       |  |
| 11                                | Stock or stock options                                                                                       | ___ None                                                       |  |
| 12                                | Receipt of equipment, materials, drugs, medical writing, gifts or other services                             | ___ None                                                       |  |

|    |                                            |                               |  |
|----|--------------------------------------------|-------------------------------|--|
| 13 | Other financial or non-financial interests | <input type="checkbox"/> None |  |
|    |                                            |                               |  |
|    |                                            |                               |  |

Please place an "X" next to the following statement to indicate your agreement:

I certify that I have answered every question and have not altered the wording of any of the questions on this form.



## ICMJE DISCLOSURE FORM

Date: June 12, 2021  
 Your Name: Qimin Zhan  
 Manuscript Title: Genomic and epigenomic evolution of acquired resistance to chemotherapy combined with verapamil in esophageal squamous cell carcinoma  
 Manuscript number (if known): 150203-INS-CMED-1

In the interest of transparency, we ask you to disclose all relationships/activities/interests listed below that are related to the content of your manuscript. "Related" means any relation with for-profit or not-for-profit third parties whose interests may be affected by the content of the manuscript. Disclosure represents a commitment to transparency and does not necessarily indicate a bias. If you are in doubt about whether to list a relationship/activity/interest, it is preferable that you do so.

The following questions apply to the author's relationships/activities/interests as they relate to the **current manuscript only**.

The author's relationships/activities/interests should be **defined broadly**. For example, if your manuscript pertains to the epidemiology of hypertension, you should declare all relationships with manufacturers of antihypertensive medication, even if that medication is not mentioned in the manuscript.

In item #1 below, report all support for the work reported in this manuscript without time limit. For all other items, the time frame for disclosure is the past 36 months.

|                                                           |                                                                                                                                                                                    | Name all entities with whom you have this relationship or indicate none (add rows as needed)                                                                                                                                                                                                                                                                                          | Specifications/Comments (e.g., if payments were made to you or to your institution) |
|-----------------------------------------------------------|------------------------------------------------------------------------------------------------------------------------------------------------------------------------------------|---------------------------------------------------------------------------------------------------------------------------------------------------------------------------------------------------------------------------------------------------------------------------------------------------------------------------------------------------------------------------------------|-------------------------------------------------------------------------------------|
| <b>Time frame: Since the initial planning of the work</b> |                                                                                                                                                                                    |                                                                                                                                                                                                                                                                                                                                                                                       |                                                                                     |
| 1                                                         | All support for the present manuscript (e.g., funding, provision of study materials, medical writing, article processing charges, etc.)<br><br><b>No time limit for this item.</b> | National Natural Science Foundation of China<br>Science Foundation of Peking University Cancer Hospital<br>CAMS Innovation Fund for Medical Sciences<br>Major Program of Shenzhen Bay Laboratory<br>Guangdong Basic and Applied Basic Research Foundation<br>The third round of public welfare development and reform pilot projects of Beijing Municipal Medical Research Institutes |                                                                                     |

|                                   |                                                                                                              |                                                                |  |
|-----------------------------------|--------------------------------------------------------------------------------------------------------------|----------------------------------------------------------------|--|
|                                   |                                                                                                              | NATIONAL INSTITUTE OF HEALTH DATA SCIENCE OF PEKING UNIVERSITY |  |
| <b>Time frame: past 36 months</b> |                                                                                                              |                                                                |  |
| 2                                 | Grants or contracts from any entity (if not indicated in item #1 above).                                     | ___ None                                                       |  |
| 3                                 | Royalties or licenses                                                                                        | ___ None                                                       |  |
| 4                                 | Consulting fees                                                                                              | ___ None                                                       |  |
| 5                                 | Payment or honoraria for lectures, presentations, speakers bureaus, manuscript writing or educational events | ___ None                                                       |  |
| 6                                 | Payment for expert testimony                                                                                 | ___ None                                                       |  |
| 7                                 | Support for attending meetings and/or travel                                                                 | ___ None                                                       |  |
| 8                                 | Patents planned, issued or pending                                                                           | ___ None                                                       |  |
| 9                                 | Participation on a Data Safety Monitoring Board or Advisory Board                                            | ___ None                                                       |  |
| 10                                | Leadership or fiduciary role in other board, society, committee or advocacy group, paid or unpaid            | ___ None                                                       |  |
| 11                                | Stock or stock options                                                                                       | ___ None                                                       |  |
| 12                                | Receipt of equipment, materials, drugs, medical writing, gifts or other services                             | ___ None                                                       |  |

|    |                                            |                               |  |
|----|--------------------------------------------|-------------------------------|--|
| 13 | Other financial or non-financial interests | <input type="checkbox"/> None |  |
|    |                                            |                               |  |
|    |                                            |                               |  |

Please place an "X" next to the following statement to indicate your agreement:

I certify that I have answered every question and have not altered the wording of any of the questions on this form.
